# Supplementary material for: A multi-iodine doped strategy for ionic conductivity enhancement of crown ether functionalized ionic liquids
Source: Royal Society of Chemistry journal article supplement (doi:10.1039/c5ra23229e), 2015-01-01
Supplement: c5ra23229e1.pdf [file c5ra23229e1.pdf]

*Electronic Supplementary Information (ESI) for*

**A multi-iodine doped strategy for ionic conductivity enhancement of crown ether functionalized ionic liquids**

Yun Wang,<sup>†</sup> Zhengnan Tian,<sup>†</sup> Pengfei Sun, Jie Zhao,\* Hao Sun, Lijun Gao\* and Guifu Zou\*

*College of Physics, Optoelectronics and Energy & Collaborative Innovation Center of Suzhou Nano Science and Technology, Soochow University, Suzhou215006, P.R. China.*

*E-mail: [jzhao@suda.edu.cn](mailto:jzhao@suda.edu.cn); [gaolijun@suda.edu.cn](mailto:gaolijun@suda.edu.cn); [zouguifu@suda.edu.cn](mailto:zouguifu@suda.edu.cn)*

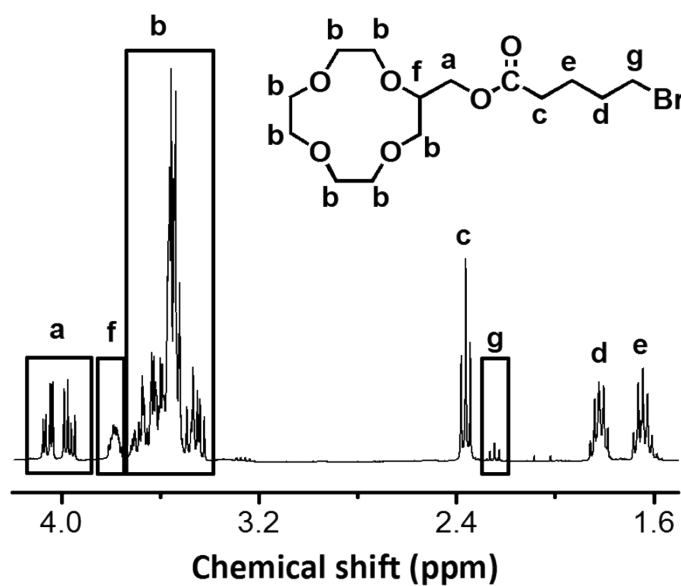

**Fig. S1** <sup>1</sup>H NMR spectrum of [12-C-4][Br]

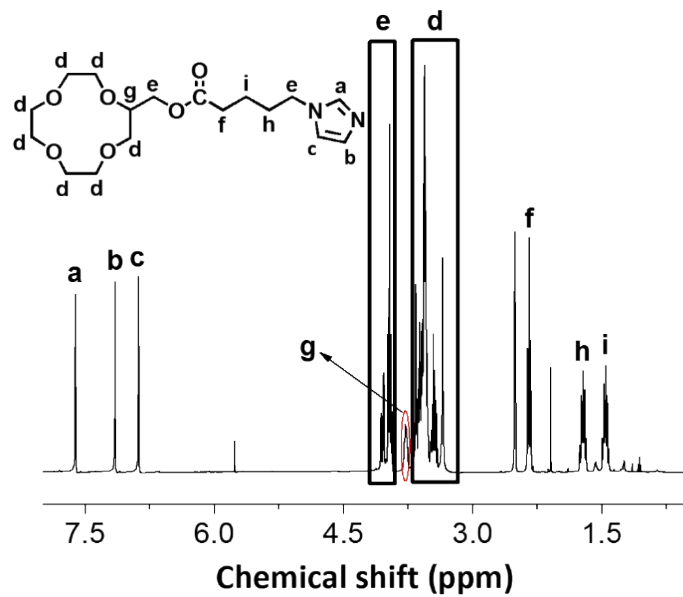

Fig. S2 <sup>1</sup>H NMR spectrum of [12-C-4][Im]

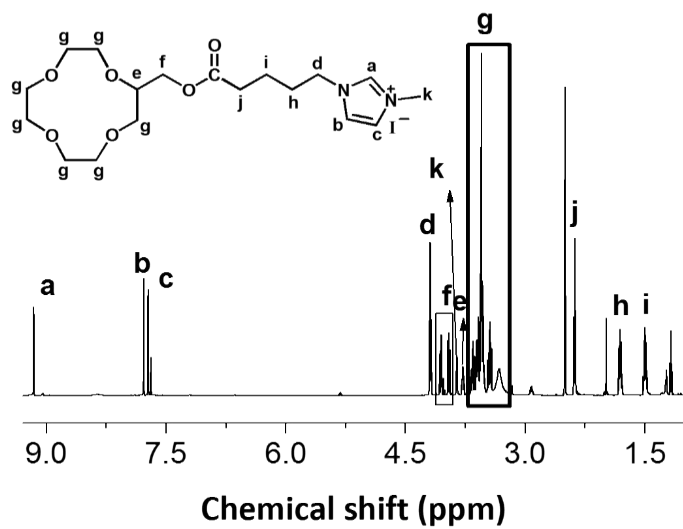

Fig. S3 <sup>1</sup>H NMR spectrum of LiI and [12-C-4][Im][I]

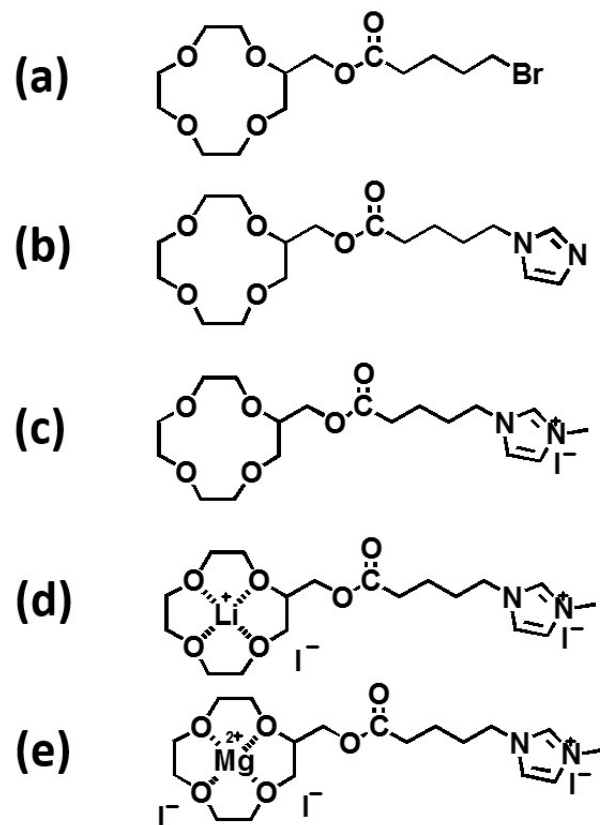

**Fig. S4** Chemical structure of the five chemicals corresponding to Fig. 2, respectively.
